# Supplementary material for: Engineering liposomal nanoparticles of cholesterol-tethered amphiphilic Pt(iv) prodrugs with prolonged circulation time in blood
Source: Royal Society of Chemistry journal article supplement (doi:10.1039/d0dt01297a), 2020-01-01
Supplement: d0dt01297a1.pdf [file d0dt01297a1.pdf]

## **Engineering Liposomal Nanoparticles of Cholesterol-Tethered Amphiphilic Pt(IV) Prodrugs with Prolonged Circulation Time in Blood**

Payel Datta,<sup>a</sup> Scott Bang,<sup>b</sup> Zhizhou Yue,<sup>a</sup> Travis Beach,<sup>a</sup> Morgan Stilgenbauer,<sup>a</sup> Han Wang,<sup>a</sup> David J. Bowers,<sup>a</sup> Manabu Kurakawa,<sup>b</sup> Haihua Xiao,<sup>c</sup> and Yao-Rong Zheng<sup>\*a</sup>

a. Department of Chemistry and Biochemistry, Kent State University, 236 Integrated Sciences Building, Kent, Ohio 44242.

b. Department of Biological Sciences, Kent State University, 211 Cunningham Hall, Kent, Ohio 44242.

c. Beijing National Laboratory for Molecular Sciences, State Key Laboratory of Polymer Physics and Chemistry, Institute of Chemistry, Chinese Academy of Sciences, Beijing 100190, P. R. China.

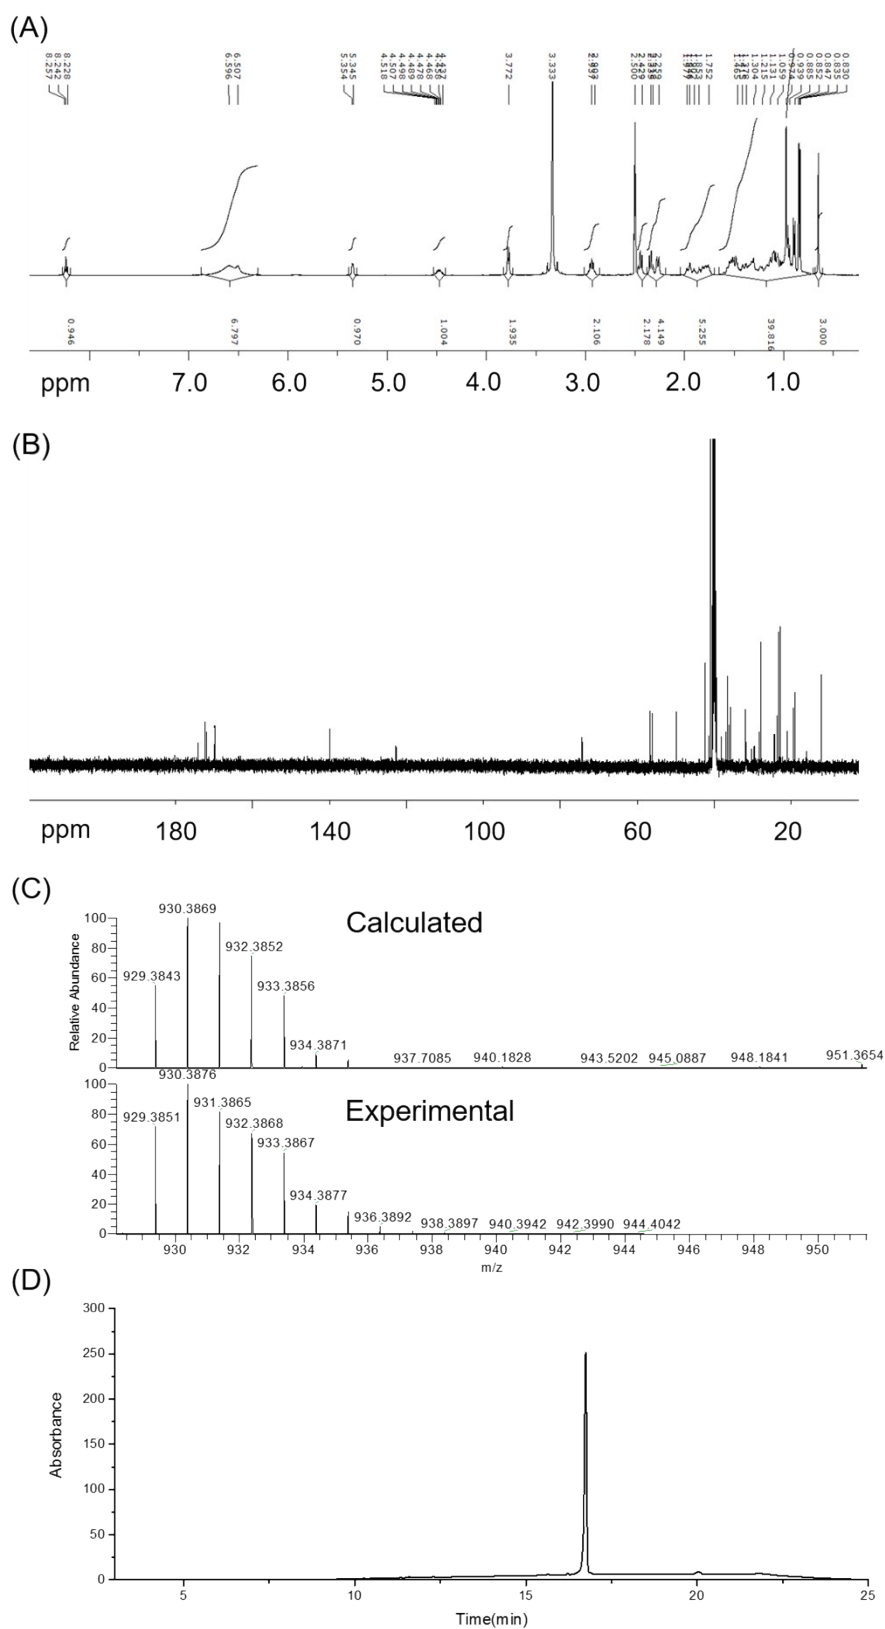

Figure S1. Characterization of the cholesterol-tethered Pt(IV) prodrug (**1**): (A)  $^1\text{H}$  NMR spectrum of **1** in  $\text{DMSO-d}_6$ ; (B)  $^{13}\text{C}$  NMR spectrum of **1** in  $\text{DMSO-d}_6$ ; (C) HR-ESI-MS of **1**; (D) HPLC analysis of **1**.

| Trial No. | DOPC (mg) | DSPE-PEG <sub>2000</sub> (mg) | 1   | Size (nm) | Zeta-potential (mV) | [Pt] ( $\mu$ M) | EE (%) | LC (%) |
|-----------|-----------|-------------------------------|-----|-----------|---------------------|-----------------|--------|--------|
| 1         | 2.5       | 0.25                          | 0.5 | 75.3      | -6.61               | 213             | 79.2   | 12.2   |
| 2         | 2.5       | 0.25                          | 1   | 86.8      | -6.08               | 276             | 51.3   | 13.7   |
| 3         | 2.5       | 0.25                          | 2   | 101.6     | -3.20               | 712             | 66.1   | 27.9   |
| 4         | 2.5       | 0.25                          | 3   | 137.5     | -6.69               | 725             | 44.9   | 23.4   |
| 5         | 2.5       | 0.25                          | 4   | 128.8     | -2.21               | 713             | 33.1   | 19.6   |

Table S1. Formulation of the liposomal nanoparticles (LNs) (EE: encapsulation efficiency. LC: Loading capacity).

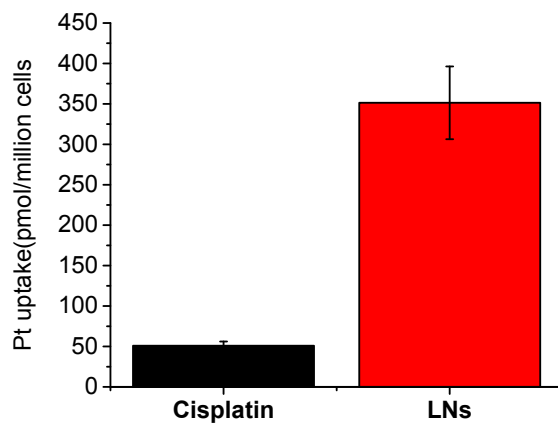

Figure S2. Cellular uptake of cisplatin and LNs in A2780cis cells ([Pt] = 10  $\mu$ M, for 21 hr at 37 °C).

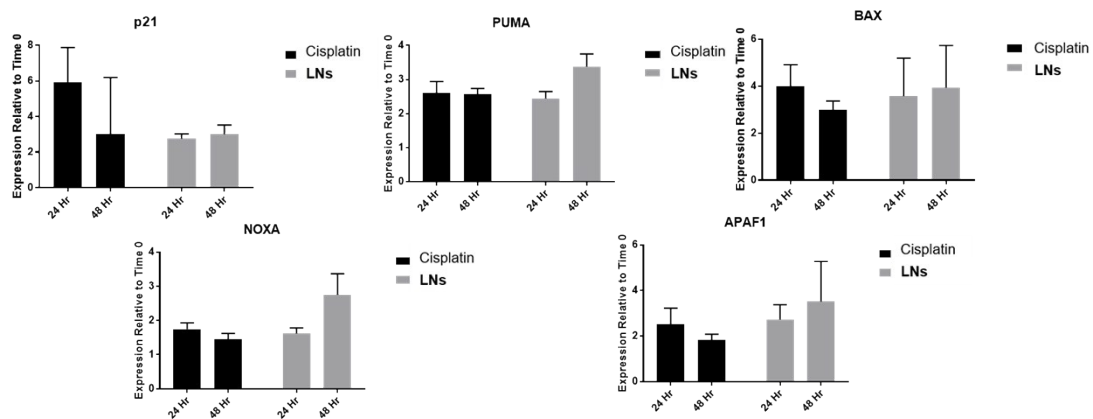

Figure S3. mRNA levels of p21, PUMA, BAX, NOXA, and APARF1 in A2780cis cells treated with cisplatin (8  $\mu$ M) and LNs ([Pt] = 6  $\mu$ M) for 24 hr and 48 hr.
